# Supplementary material
Source: PubMed Central journal article supplement (PMC9390845)
Supplement: uxac068_suppl_supplementary_table.pdf [file uxac068_suppl_supplementary_table.pdf]

1

2 Table S1 Sequences of primers used for quantitative real-time PCR

| Primer       | Forward sequence (5'→ 3') | Reverse sequence (5'→ 3') |
|--------------|---------------------------|---------------------------|
| <i>HLA-A</i> | GATTACATCGCCTTGAACGAGG    | AGAGACAGCGTGGTGAGTCAT     |
| <i>HLA-B</i> | CAGTTCGTGAGGTTTCGACAG     | CAGCCGTACATGCTCTGGA       |
| <i>HLA-C</i> | CCATGAGGTATTTGTGGACCG     | TCTCGGACTCTCGTCGTCG       |
| <i>HLA-E</i> | TTCCGAGTGAATCTGCGGAC      | GTCGTAGGCGAACTGTTCATAC    |
| <i>HLA-G</i> | GAGGAGACACGGAACACCAAG     | GTCGCAGCCAATCATCCACT      |
| <i>MICA</i>  | CTTCAGAGTCATTGGCAGACAT    | TGTGGTCACTCGTCCCAACT      |
| <i>MICB</i>  | TCTTCGTTACAACCTCATGGTG    | TCCCAGGTCTTAGCTCCCAG      |
| <i>ICAM1</i> | GTATGAACTGAGCAATGTGCAAG   | GTTCCACCCGTTCTGGAGTC      |
| <i>ULBP1</i> | TAAGTCCAGACCTGAACCACA     | TCCACCACGTCTCTTAGTGTT     |
| <i>ULBP2</i> | ACTATGACTGTGGCAACAAGAC    | CTGCCCATCGAACTGAACTG      |
| <i>ULBP3</i> | TCTATGGGTCACCTAGAAGAGC    | TCCACTGGGTGTGAAATCCTC     |
| <i>ACTB</i>  | GTGAAGGTGACAGCAGTCGGT     | AAGTGGGGTGGCTTTTAGGA      |

3

4

5 Table S2 ChIP primers used for the analysis of the CTNNB1 promoter

| ChIP Site    | Forward primer (5'-3')  | Reverse primer (5'-3')    |
|--------------|-------------------------|---------------------------|
| -2719~- 2620 | TGGTAGAATGACACAGTCAGC   | CCTTGATAAAAATGAGGAAAGTGGA |
| -2455~- 2340 | GGGCAGCATTGTTAGGAGAGA   | TGGGCCTAGAAAAGTGGAAGAA    |
| -1860~- 1762 | TTCTGGCACTGTGACCTTCTC   | TAAGGAGAGTGGTTGCTGGT      |
| -1462~- 1362 | GCCATAACCTCCATACATACCCA | CCCCTCACCAATCCATGCT       |
| -909~- 806   | TCACCCACACAAAGATGGC     | CACTCACCACCCTAGCACTG      |

6

7
